# Supplementary material for: How Rainfall Events Modify Trace Gas Concentrations in Central Amazonia
Source: Copernicus journal article supplement (doi:10.5194/egusphere-2023-2901), 2024-01-23
Supplement: Supplementary file 1 [file egusphere-2023-2901-supplement.pdf]

# S1 How Rainfall Events Modify Trace Gas Concentrations in Central Amazonia

Machado et al.

Correspondence to: Luiz A. T. Machado - l.machado@mpic.de

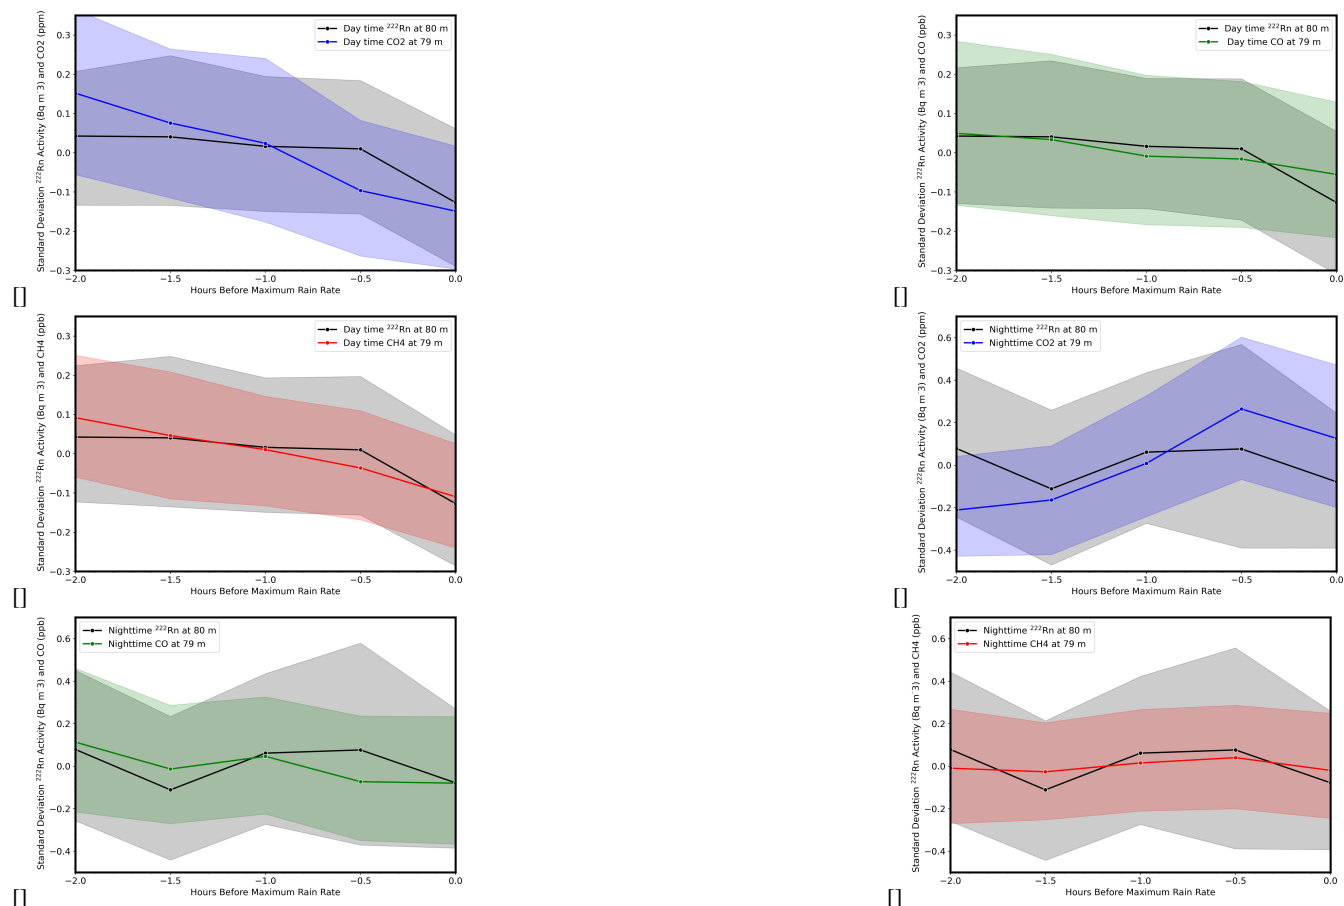

**Figure S1.** Composite plot with ATTO data in rain event-normalized representation, which shows data from two hours before to the time of the maximum rain rate for January 2019 to December 2020. Variations are presented as a number of standard deviations. The upper panel corresponds to the daytime, and the bottom panel for the nighttime calculations. All data was collected at the top of the Instant tower at height. All figures show the variation  $^{222}\text{Rn}$  combined with Figure A) and D)  $\text{CO}_2$ , during the day and night, B) and E)  $\text{CO}$ , during the day and night and C) and F)  $\text{CH}_4$ , during the day and night
